# Supplementary material
Source: MDPI journal article supplement (https://www.mdpi.com/2073-4395/12/4/957)
Supplement: s1 [file s1]

**Table S1** The list of 301 accessions and their locations, DTF, PSI, BVP, panicle number, tiller number and grain yield

| Accession | Province    | Part of Thailand | DTF | BVP | PSI | panicle<br>number | tiller<br>number | GY<br>(g/m <sup>2</sup> ) |
|-----------|-------------|------------------|-----|-----|-----|-------------------|------------------|---------------------------|
| ULR001    | Phitsanulok | Northern         | 108 | 20  | 0.6 | 11.6              | 14.3             | 71.3                      |
| ULR002    | Phitsanulok | Northern         | 109 | 32  | 0.5 | 11.5              | 12.4             | 121.5                     |
| ULR003    | Khon Kaen   | Northeastern     | 101 | 24  | 0.4 | 16.6              | 18.0             | 99.9                      |
| ULR005    | Phetchabun  | Central          | 99  | 23  | 0.6 | 16.5              | 15.5             | 265.3                     |
| ULR006    | Phetchabun  | Central          | 104 | 26  | 0.6 | 13.5              | 12.9             | 164.8                     |
| ULR007    | Phetchabun  | Central          | 100 | 26  | 0.5 | 12.8              | 16.8             | 320.9                     |
| ULR008    | Khon Kaen   | Northeastern     | 104 | 25  | 0.4 | 19.1              | 19.8             | 115.4                     |
| ULR009    | Chiang Mai  | Northeastern     | 91  | 19  | 0.2 | 19.5              | 18.8             | 151.4                     |
| ULR010    | Phetchabun  | Central          | 91  | 43  | 0.3 | 14.8              | 15.6             | 450.1                     |
| ULR013    | Phetchabun  | Central          | 101 | 26  | 0.6 | 9.9               | 9.0              | 168.3                     |
| ULR014    | Loei        | Northeastern     | 109 | 14  | 0.7 | 21.8              | 21.6             | 43.2                      |
| ULR017    | Phetchabun  | Central          | 104 | 27  | 0.6 | 11.0              | 11.4             | 155.3                     |
| ULR018    | Phitsanulok | Northern         | 105 | 18  | 0.7 | 16.0              | 19.0             | 296.8                     |
| ULR020    | Loei        | Northeastern     | 102 | 26  | 0.6 | 12.3              | 13.1             | 198.0                     |
| ULR021    | Khon Kaen   | Northeastern     | 100 | 24  | 0.6 | 11.9              | 15.0             | 151.6                     |
| ULR022    | Loei        | Northeastern     | 102 | 25  | 0.6 | 13.6              | 15.1             | 84.4                      |
| ULR023    | Phitsanulok | Northern         | 102 | 21  | 0.5 | 10.4              | 10.9             | 254.5                     |
| ULR024    | Phitsanulok | Northern         | 104 | 23  | 0.6 | 9.4               | 9.4              | 169.7                     |
| ULR026    | Phitsanulok | Northern         | 98  | 33  | 0.4 | 19.6              | 21.5             | 311.2                     |
| ULR027    | Phitsanulok | Northern         | 124 | 23  | 0.8 | 8.5               | 11.5             | 0.0                       |
| ULR031    | Phitsanulok | Northern         | 111 | 26  | 0.7 | 13.1              | 14.6             | 103.4                     |
| ULR032    | Phitsanulok | Northern         | 94  | 34  | 0.3 | 15.0              | 17.3             | 261.1                     |
| ULR034    | Loei        | Northeastern     | 101 | 22  | 0.6 | 13.1              | 16.3             | 251.5                     |
| ULR035    | Phitsanulok | Northern         | 104 | 25  | 0.6 | 12.9              | 11.8             | 207.1                     |
| ULR036    | Loei        | Northeastern     | 103 | 22  | 0.6 | 17.5              | 19.8             | 394.9                     |
| ULR037    | Phitsanulok | Northern         | 92  | 43  | 0.3 | 18.6              | 14.8             | 198.5                     |
| ULR038    | Phitsanulok | Northern         | 107 | 24  | 0.7 | 13.8              | 14.4             | 235.6                     |
| ULR039    | Phitsanulok | Northern         | 102 | 24  | 0.5 | 14.0              | 14.3             | 419.6                     |
| ULR040    | Phitsanulok | Northern         | 104 | 24  | 0.6 | 16.1              | 16.0             | 191.5                     |
| ULR042    | Phitsanulok | Northern         | 107 | 12  | 0.8 | 11.4              | 13.9             | 114.2                     |
| ULR043    | Phitsanulok | Northern         | 109 | 14  | 0.8 | 20.4              | 19.4             | 140.2                     |
| ULR044    | Phitsanulok | Northern         | 103 | 18  | 0.6 | 16.9              | 17.1             | 211.2                     |
| ULR046    | Phitsanulok | Northern         | 106 | 26  | 0.7 | 10.3              | 11.3             | 199.9                     |

|        |                  |              |     |    |     |      |      |       |
|--------|------------------|--------------|-----|----|-----|------|------|-------|
| ULR047 | Loei             | Northeastern | 102 | 23 | 0.6 | 7.6  | 11.6 | 42.7  |
| ULR048 | Phitsanulok      | Northern     | 108 | 26 | 0.5 | 10.5 | 12.3 | 109.9 |
| ULR049 | Phitsanulok      | Northern     | 96  | 24 | 0.6 | 10.8 | 10.8 | 292.3 |
| ULR052 | Phitsanulok      | Northern     | 115 | 12 | 0.8 | 10.6 | 14.5 | 150.6 |
| ULR053 | Phitsanulok      | Northern     | 101 | 29 | 0.6 | 15.8 | 14.1 | 194.7 |
| ULR054 | Phitsanulok      | Northern     | 104 | 22 | 0.6 | 12.5 | 13.0 | 180.2 |
| ULR056 | Phetchabun       | Central      | 98  | 25 | 0.5 | 11.9 | 18.0 | 312.4 |
| ULR057 | Phetchabun       | Central      | 111 | 14 | 0.7 | 14.4 | 15.0 | 26.2  |
| ULR059 | Phitsanulok      | Northern     | 102 | 23 | 0.6 | 10.5 | 14.5 | 134.8 |
| ULR060 | Phitsanulok      | Northern     | 98  | 21 | 0.6 | 10.8 | 11.0 | 97.4  |
| ULR061 | Phitsanulok      | Northern     | 106 | 26 | 0.6 | 14.3 | 14.6 | 117.7 |
| ULR062 | Phitsanulok      | Northern     | 106 | 23 | 0.5 | 14.0 | 15.9 | 166.4 |
| ULR063 | Phitsanulok      | Northern     | 103 | 18 | 0.6 | 13.1 | 13.0 | 258.4 |
| ULR065 | Phitsanulok      | Northern     | 108 | 29 | 0.7 | 10.4 | 10.6 | 61.7  |
| ULR066 | Loei             | Northeastern | 115 | 73 | 0.2 | 24.6 | 25.9 | 0.0   |
| ULR067 | Phitsanulok      | Northern     | 105 | 18 | 0.7 | 17.4 | 20.3 | 173.6 |
| ULR068 | Phitsanulok      | Northern     | 107 | 30 | 0.3 | 16.0 | 16.6 | 107.9 |
| ULR069 | Phitsanulok      | Northern     | 99  | 23 | 0.5 | 12.6 | 15.1 | 231.3 |
| ULR070 | Phitsanulok      | Northern     | 106 | 24 | 0.6 | 17.3 | 14.4 | 124.8 |
| ULR071 | Sukhothai        | Central      | 112 | 19 | 0.6 | 16.3 | 18.5 | 81.7  |
| ULR075 | Khon Kaen        | Northeastern | 112 | 18 | 0.6 | 21.9 | 22.4 | 96.7  |
| ULR076 | Phrae            | Northern     | 91  | 41 | 0.3 | 21.5 | 21.8 | 656.5 |
| ULR077 | Phrae            | Northern     | 123 | 22 | 0.7 | 14.1 | 15.0 | 0.0   |
| ULR078 | Surin            | Northeastern | 107 | 15 | 0.7 | 22.5 | 23.4 | 196.0 |
| ULR080 | Mukdahan         | Northeastern | 109 | 18 | 0.8 | 17.6 | 17.1 | 123.9 |
| ULR081 | Khon Kaen        | Northeastern | 104 | 21 | 0.4 | 21.5 | 21.3 | 182.4 |
| ULR083 | Si Sa Ket        | Northeastern | 105 | 23 | 0.7 | 15.3 | 14.1 | 313.7 |
| ULR084 | Chiang Mai       | Northern     | 93  | 32 | 0.2 | 21.0 | 20.3 | 166.4 |
| ULR085 | Uttaradit        | Northern     | 106 | 18 | 0.8 | 16.8 | 18.4 | 287.0 |
| ULR086 | Nakhon<br>Phanom | Northeastern | 117 | 20 | 0.7 | 11.1 | 18.4 | 0.0   |
| ULR087 | Khon Kaen        | Northeastern | 104 | 18 | 0.7 | 13.6 | 16.9 | 235.5 |
| ULR088 | Phrae            | Northern     | 104 | 18 | 0.8 | 11.9 | 17.3 | 257.5 |
| ULR089 | Sakon Nakhon     | Northeastern | 119 | 21 | 0.7 | 17.8 | 16.1 | 0.0   |
| ULR090 | Lampang          | Northern     | 91  | 39 | 0.2 | 11.9 | 14.1 | 245.3 |
| ULR091 | Phrae            | Northern     | 98  | 18 | 0.5 | 22.1 | 18.8 | 303.9 |
| ULR092 | Lampang          | Northern     | 118 | 15 | 0.8 | 16.0 | 18.6 | 0.0   |

|        |                   |              |     |    |     |      |      |       |
|--------|-------------------|--------------|-----|----|-----|------|------|-------|
| ULR093 | Khon Kaen         | Northeastern | 122 | 17 | 0.9 | 14.6 | 19.9 | 0.0   |
| ULR095 | Loei              | Northeastern | 113 | 14 | 0.7 | 17.5 | 17.8 | 147.5 |
| ULR097 | Chiang Mai        | Northern     | 113 | 42 | 0.0 | 24.4 | 27.4 | 10.6  |
| ULR098 | Sakon Nakhon      | Northeastern | 108 | 21 | 0.5 | 19.8 | 25.9 | 89.0  |
| ULR100 | Si Sa Ket         | Northeastern | 123 | 24 | 0.8 | 24.3 | 25.5 | 0.0   |
| ULR101 | Chiang Rai        | Northern     | 105 | 72 | 0.0 | 21.0 | 21.9 | 0.0   |
| ULR103 | Nakhon Ratchasima | Northeastern | 114 | 20 | 0.7 | 10.5 | 9.8  | 49.0  |
| ULR104 | Chaiyaphum        | Northeastern | 100 | 24 | 0.6 | 14.3 | 13.3 | 225.2 |
| ULR105 | Mae Hong Son      | Northern     | 106 | 19 | 0.6 | 22.3 | 22.9 | 166.0 |
| ULR106 | Loei              | Northeastern | 103 | 24 | 0.6 | 11.9 | 14.1 | 129.9 |
| ULR107 | Phetchabun        | Northern     | 108 | 29 | 0.6 | 12.5 | 13.9 | 182.9 |
| ULR108 | Phetchabun        | Northern     | 105 | 26 | 0.6 | 13.3 | 14.1 | 273.2 |
| ULR109 | Phetchabun        | Northern     | 105 | 20 | 0.6 | 11.0 | 12.9 | 119.2 |
| ULR110 | Phetchabun        | Central      | 106 | 18 | 0.5 | 11.6 | 14.1 | 59.4  |
| ULR111 | Phetchabun        | Central      | 109 | 20 | 0.7 | 16.0 | 17.1 | 254.5 |
| ULR112 | Phetchabun        | Central      | 113 | 18 | 0.8 | 15.6 | 16.5 | 105.4 |
| ULR114 | Phrae             | Northern     | 118 | 21 | 0.6 | 14.1 | 16.8 | 0.0   |
| ULR115 | Phrae             | Northern     | 110 | 38 | 0.3 | 17.5 | 14.1 | 75.7  |
| ULR117 | Chiang Mai        | Northern     | 94  | 21 | 0.4 | 10.0 | 12.9 | 251.8 |
| ULR118 | Chiang Mai        | Northern     | 98  | 19 | 0.4 | 9.8  | 12.3 | 277.7 |
| ULR120 | Chiang Mai        | Northern     | 100 | 19 | 0.5 | 9.9  | 12.1 | 212.4 |
| ULR121 | Chiang Mai        | Northern     | 99  | 21 | 0.6 | 9.3  | 12.4 | 156.9 |
| ULR122 | Chiang Mai        | Northern     | 94  | 18 | 0.5 | 10.3 | 10.5 | 183.1 |
| ULR123 | Chiang Mai        | Northern     | 111 | 18 | 0.8 | 11.0 | 11.9 | 37.9  |
| ULR124 | Chiang Mai        | Northern     | 111 | 26 | 0.6 | 12.3 | 14.3 | 177.0 |
| ULR125 | Chiang Mai        | Northern     | 102 | 21 | 0.5 | 10.5 | 13.8 | 129.6 |
| ULR126 | Chiang Mai        | Northern     | 108 | 21 | 0.7 | 14.6 | 15.4 | 164.8 |
| ULR127 | Chiang Mai        | Northern     | 101 | 25 | 0.6 | 14.3 | 15.3 | 213.5 |
| ULR128 | Chiang Mai        | Northern     | 116 | 20 | 0.8 | 13.6 | 13.9 | 0.0   |
| ULR129 | Chiang Mai        | Northern     | 114 | 19 | 0.6 | 14.3 | 17.3 | 38.5  |
| ULR130 | Chiang Mai        | Northern     | 113 | 21 | 0.7 | 19.4 | 19.4 | 118.0 |
| ULR131 | Chiang Mai        | Northern     | 113 | 20 | 0.7 | 20.1 | 17.3 | 100.9 |
| ULR132 | Chiang Mai        | Northern     | 112 | 18 | 0.7 | 21.0 | 18.9 | 12.8  |
| ULR133 | Chiang Mai        | Northern     | 104 | 23 | 0.6 | 17.9 | 15.0 | 240.7 |
| ULR134 | Loei              | Northeastern | 105 | 25 | 0.7 | 15.8 | 17.1 | 129.5 |
| ULR136 | Loei              | Northeastern | 101 | 26 | 0.6 | 7.9  | 9.3  | 250.3 |

|        |             |              |     |    |     |      |      |       |
|--------|-------------|--------------|-----|----|-----|------|------|-------|
| ULR137 | Loei        | Northeastern | 105 | 30 | 0.7 | 12.8 | 12.9 | 182.8 |
| ULR138 | Loei        | Northeastern | 105 | 16 | 0.7 | 17.0 | 18.9 | 38.6  |
| ULR139 | Loei        | Northeastern | 102 | 26 | 0.6 | 10.4 | 11.3 | 244.8 |
| ULR140 | Loei        | Northeastern | 107 | 21 | 0.7 | 11.0 | 9.3  | 20.6  |
| ULR141 | Loei        | Northeastern | 106 | 21 | 0.7 | 11.1 | 14.0 | 78.6  |
| ULR142 | Loei        | Northeastern | 105 | 29 | 0.7 | 15.5 | 15.8 | 189.3 |
| ULR143 | Loei        | Northeastern | 103 | 37 | 0.6 | 13.0 | 12.3 | 137.1 |
| ULR144 | Loei        | Northeastern | 99  | 24 | 0.5 | 14.1 | 13.4 | 197.9 |
| ULR145 | Loei        | Northeastern | 109 | 25 | 0.8 | 13.6 | 12.3 | 78.1  |
| ULR146 | Loei        | Northeastern | 105 | 32 | 0.6 | 11.4 | 12.6 | 133.7 |
| ULR147 | Loei        | Northeastern | 97  | 24 | 0.5 | 11.9 | 11.1 | 242.3 |
| ULR148 | Loei        | Northeastern | 96  | 25 | 0.5 | 12.4 | 11.6 | 282.2 |
| ULR150 | Loei        | Northeastern | 103 | 23 | 0.7 | 8.3  | 13.6 | 121.9 |
| ULR151 | Loei        | Northeastern | 104 | 16 | 0.6 | 11.5 | 11.6 | 163.5 |
| ULR152 | Loei        | Northeastern | 106 | 19 | 0.8 | 15.4 | 17.4 | 164.7 |
| ULR153 | Loei        | Northeastern | 104 | 25 | 0.6 | 13.1 | 17.3 | 141.4 |
| ULR154 | Loei        | Northeastern | 93  | 23 | 0.6 | 14.1 | 15.1 | 198.0 |
| ULR155 | Loei        | Northeastern | 95  | 24 | 0.6 | 12.6 | 13.8 | 350.2 |
| ULR157 | Loei        | Northeastern | 102 | 25 | 0.6 | 12.6 | 11.6 | 162.9 |
| ULR158 | Loei        | Northeastern | 110 | 30 | 0.6 | 11.4 | 11.0 | 158.4 |
| ULR159 | Loei        | Northeastern | 117 | 19 | 0.7 | 20.1 | 20.1 | 0.0   |
| ULR160 | Loei        | Northeastern | 98  | 26 | 0.5 | 14.0 | 14.1 | 333.4 |
| ULR161 | Phetchabun  | Northern     | 106 | 26 | 0.6 | 12.1 | 13.5 | 172.6 |
| ULR162 | Phetchabun  | Northern     | 91  | 42 | 0.2 | 11.4 | 12.9 | 301.7 |
| ULR163 | Phetchabun  | Northern     | 106 | 26 | 0.7 | 11.1 | 14.9 | 252.6 |
| ULR164 | Phetchabun  | Northern     | 113 | 18 | 0.8 | 16.3 | 18.1 | 83.5  |
| ULR165 | Phetchabun  | Northern     | 98  | 28 | 0.5 | 12.1 | 15.0 | 197.0 |
| ULR166 | Phetchabun  | Northern     | 105 | 25 | 0.6 | 10.6 | 14.0 | 150.4 |
| ULR168 | Phetchabun  | Northern     | 106 | 30 | 0.6 | 14.4 | 15.5 | 188.5 |
| ULR169 | Phetchabun  | Northern     | 109 | 26 | 0.8 | 14.4 | 12.1 | 132.7 |
| ULR170 | Phetchabun  | Northern     | 108 | 17 | 0.7 | 16.5 | 15.1 | 210.3 |
| ULR172 | Phitsanulok | Northern     | 102 | 24 | 0.6 | 11.5 | 9.9  | 177.4 |
| ULR173 | Phitsanulok | Northern     | 104 | 28 | 0.6 | 10.3 | 10.6 | 91.7  |
| ULR174 | Phetchabun  | Northern     | 100 | 26 | 0.5 | 15.4 | 15.5 | 267.3 |
| ULR175 | Phetchabun  | Northern     | 106 | 28 | 0.7 | 11.1 | 13.8 | 195.5 |
| ULR176 | Phetchabun  | Northern     | 104 | 24 | 0.6 | 13.5 | 14.4 | 139.2 |
| ULR177 | Phetchabun  | Northern     | 109 | 18 | 0.8 | 12.6 | 12.9 | 35.8  |

|        |            |          |     |    |     |      |      |       |
|--------|------------|----------|-----|----|-----|------|------|-------|
| ULR178 | Phetchabun | Northern | 104 | 30 | 0.6 | 13.4 | 12.5 | 229.6 |
| ULR179 | Phetchabun | Northern | 101 | 24 | 0.6 | 13.0 | 14.0 | 157.3 |
| ULR180 | Phetchabun | Northern | 101 | 30 | 0.5 | 16.0 | 15.4 | 208.4 |
| ULR184 | Phetchabun | Northern | 98  | 24 | 0.4 | 10.6 | 13.3 | 238.0 |
| ULR185 | Phetchabun | Northern | 107 | 21 | 0.5 | 11.4 | 12.9 | 121.1 |
| ULR186 | Phetchabun | Northern | 99  | 26 | 0.5 | 14.9 | 14.0 | 163.9 |
| ULR187 | Phetchabun | Northern | 102 | 23 | 0.5 | 10.5 | 11.6 | 187.4 |
| ULR188 | Phetchabun | Northern | 105 | 21 | 0.6 | 14.0 | 14.8 | 208.3 |
| ULR189 | Phetchabun | Northern | 103 | 26 | 0.6 | 14.9 | 14.8 | 420.6 |
| ULR190 | Phetchabun | Northern | 98  | 19 | 0.5 | 13.6 | 15.6 | 248.7 |
| ULR191 | Phetchabun | Northern | 115 | 18 | 0.9 | 18.4 | 18.1 | 49.0  |
| ULR192 | Phetchabun | Northern | 107 | 19 | 0.6 | 20.4 | 21.3 | 235.5 |
| ULR195 | Phetchabun | Northern | 110 | 26 | 0.6 | 10.3 | 16.8 | 37.6  |
| ULR197 | Phetchabun | Northern | 100 | 23 | 0.6 | 11.4 | 12.9 | 282.5 |
| ULR201 | Phetchabun | Northern | 100 | 27 | 0.6 | 12.0 | 11.6 | 188.1 |
| ULR204 | Phetchabun | Northern | 97  | 25 | 0.4 | 16.3 | 17.5 | 304.8 |
| ULR205 | Phetchabun | Northern | 105 | 24 | 0.6 | 10.1 | 15.3 | 168.7 |
| ULR206 | Phetchabun | Northern | 106 | 27 | 0.7 | 13.4 | 10.8 | 241.0 |
| ULR210 | Chiang Mai | Northern | 100 | 17 | 0.5 | 11.4 | 14.1 | 253.1 |
| ULR211 | Chiang Mai | Northern | 107 | 26 | 0.7 | 19.1 | 18.8 | 303.5 |
| ULR212 | Chiang Mai | Northern | 100 | 25 | 0.5 | 15.8 | 16.4 | 309.5 |
| ULR213 | Chiang Mai | Northern | 94  | 42 | 0.3 | 18.0 | 12.3 | 230.1 |
| ULR214 | Chiang Mai | Northern | 107 | 18 | 0.7 | 15.4 | 20.8 | 175.4 |
| ULR215 | Chiang Mai | Northern | 109 | 26 | 0.6 | 12.6 | 11.0 | 107.3 |
| ULR216 | Chiang Mai | Northern | 109 | 29 | 0.7 | 13.6 | 14.9 | 166.3 |
| ULR217 | Chiang Mai | Northern | 110 | 24 | 0.5 | 14.1 | 14.3 | 165.1 |
| ULR218 | Chiang Mai | Northern | 113 | 18 | 0.7 | 10.9 | 13.6 | 17.8  |
| ULR219 | Chiang Mai | Northern | 112 | 20 | 0.6 | 12.0 | 12.9 | 25.3  |
| ULR220 | Chiang Mai | Northern | 110 | 19 | 0.7 | 9.3  | 14.0 | 97.4  |
| ULR222 | Chiang Mai | Northern | 107 | 23 | 0.5 | 13.0 | 13.4 | 221.7 |
| ULR225 | Chiang Mai | Northern | 98  | 30 | 0.5 | 12.8 | 16.5 | 330.4 |
| ULR226 | Chiang Mai | Northern | 111 | 30 | 0.8 | 14.1 | 12.6 | 147.6 |
| ULR227 | Chiang Mai | Northern | 110 | 23 | 0.7 | 10.8 | 12.6 | 141.2 |
| ULR229 | Chiang Mai | Northern | 109 | 18 | 0.8 | 9.4  | 12.5 | 160.8 |
| ULR230 | Chiang Mai | Northern | 101 | 28 | 0.6 | 9.5  | 9.5  | 216.8 |
| ULR232 | Chiang Mai | Northern | 102 | 26 | 0.5 | 13.0 | 14.8 | 361.8 |
| ULR233 | Phetchabun | Central  | 108 | 26 | 0.6 | 12.3 | 12.5 | 100.0 |

|        |             |              |     |    |     |      |      |       |
|--------|-------------|--------------|-----|----|-----|------|------|-------|
| ULR235 | Phetchabun  | Central      | 108 | 18 | 0.8 | 18.3 | 18.4 | 160.7 |
| ULR237 | Phetchabun  | Central      | 107 | 32 | 0.7 | 15.9 | 16.3 | 114.0 |
| ULR238 | Phetchabun  | Central      | 107 | 26 | 0.6 | 15.1 | 14.9 | 57.2  |
| ULR240 | Phetchabun  | Central      | 107 | 28 | 0.5 | 11.6 | 14.0 | 173.8 |
| ULR241 | Phetchabun  | Central      | 109 | 33 | 0.7 | 10.9 | 12.0 | 94.6  |
| ULR242 | Phetchabun  | Central      | 95  | 23 | 0.5 | 13.9 | 14.6 | 165.5 |
| ULR243 | Phetchabun  | Central      | 95  | 23 | 0.5 | 12.3 | 11.5 | 280.3 |
| ULR244 | Khon Kaen   | Northeastern | 106 | 24 | 0.6 | 18.6 | 19.8 | 251.7 |
| ULR245 | Khon Kaen   | Northeastern | 94  | 22 | 0.5 | 13.3 | 13.6 | 375.4 |
| ULR246 | Khon Kaen   | Northeastern | 109 | 21 | 0.6 | 17.0 | 18.3 | 156.3 |
| ULR247 | Phetchabun  | Central      | 107 | 26 | 0.6 | 13.1 | 12.6 | 148.4 |
| ULR248 | Phetchabun  | Central      | 107 | 30 | 0.7 | 12.0 | 11.0 | 102.0 |
| ULR249 | Phetchabun  | Central      | 110 | 29 | 0.8 | 7.4  | 12.4 | 124.5 |
| ULR250 | Phetchabun  | Central      | 112 | 21 | 0.7 | 14.3 | 14.3 | 123.8 |
| ULR251 | Phetchabun  | Central      | 95  | 23 | 0.5 | 11.6 | 12.6 | 322.1 |
| ULR252 | Phetchabun  | Central      | 103 | 29 | 0.6 | 11.8 | 14.4 | 306.7 |
| ULR253 | Phetchabun  | Central      | 111 | 28 | 0.6 | 17.3 | 16.3 | 40.1  |
| ULR255 | Nan         | Northern     | 106 | 26 | 0.5 | 13.3 | 15.0 | 83.0  |
| ULR258 | Phetchabun  | Central      | 108 | 26 | 0.6 | 12.3 | 13.6 | 109.2 |
| ULR259 | Chiang Mai  | Northern     | 118 | 21 | 0.7 | 14.0 | 12.5 | 0.0   |
| ULR263 | Chaiyaphum  | Northeastern | 109 | 28 | 0.7 | 11.1 | 11.9 | 171.1 |
| ULR264 | Chaiyaphum  | Northeastern | 101 | 25 | 0.5 | 12.4 | 12.4 | 244.2 |
| ULR265 | Chaiyaphum  | Northeastern | 115 | 21 | 0.6 | 14.8 | 11.1 | 56.1  |
| ULR267 | Mukdahan    | Northeastern | 92  | 42 | 0.3 | 23.1 | 24.6 | 265.6 |
| ULR268 | Yasothon    | Northeastern | 115 | 18 | 0.6 | 17.4 | 21.5 | 0.0   |
| ULR272 | Yasothon    | Northeastern | 110 | 24 | 0.7 | 9.3  | 11.0 | 73.5  |
| ULR273 | Yasothon    | Northeastern | 98  | 25 | 0.5 | 12.9 | 13.5 | 286.4 |
| ULR274 | Yasothon    | Northeastern | 108 | 66 | 0.0 | 11.8 | 13.8 | 17.5  |
| ULR277 | Phatthalung | Southern     | 113 | 71 | 0.0 | 9.4  | 10.4 | 63.0  |
| ULR278 | Phatthalung | Southern     | 104 | 69 | 0.0 | 13.8 | 12.5 | 106.4 |
| ULR282 | Phatthalung | Southern     | 105 | 63 | 0.1 | 12.1 | 13.1 | 78.6  |
| ULR283 | Phatthalung | Southern     | 107 | 58 | 0.0 | 10.4 | 15.6 | 50.9  |
| ULR285 | Phatthalung | Southern     | 104 | 23 | 0.5 | 13.4 | 15.0 | 202.2 |
| ULR291 | Phatthalung | Southern     | 110 | 63 | 0.1 | 7.5  | 11.3 | 9.9   |
| ULR293 | Nan         | Northern     | 105 | 18 | 0.6 | 14.5 | 14.3 | 320.9 |
| ULR294 | Nan         | Northern     | 103 | 19 | 0.6 | 15.5 | 15.5 | 229.3 |
| ULR295 | Nan         | Northern     | 104 | 19 | 0.6 | 19.6 | 21.3 | 301.8 |

|        |                 |              |     |    |     |      |      |       |
|--------|-----------------|--------------|-----|----|-----|------|------|-------|
| ULR296 | Nan             | Northern     | 106 | 23 | 0.7 | 10.0 | 11.3 | 99.4  |
| ULR297 | Nan             | Northern     | 112 | 26 | 0.7 | 13.0 | 13.6 | 42.5  |
| ULR299 | Nan             | Northern     | 106 | 21 | 0.8 | 10.8 | 10.4 | 138.7 |
| ULR300 | Nan             | Northern     | 98  | 26 | 0.6 | 12.1 | 16.3 | 41.8  |
| ULR301 | Nan             | Northern     | 110 | 18 | 0.8 | 18.1 | 17.3 | 126.2 |
| ULR302 | Nan             | Northern     | 108 | 21 | 0.7 | 18.0 | 18.6 | 121.2 |
| ULR305 | Nan             | Northern     | 106 | 23 | 0.7 | 13.3 | 13.5 | 268.1 |
| ULR306 | Nan             | Northern     | 100 | 23 | 0.6 | 11.3 | 13.9 | 104.6 |
| ULR307 | Nan             | Northern     | 113 | 25 | 0.8 | 13.6 | 14.9 | 39.9  |
| ULR308 | Nan             | Northern     | 107 | 19 | 0.6 | 23.3 | 22.4 | 303.3 |
| ULR309 | Nan             | Northern     | 100 | 24 | 0.6 | 12.8 | 14.0 | 203.9 |
| ULR310 | Nan             | Northern     | 112 | 28 | 0.8 | 14.1 | 14.0 | 65.0  |
| ULR312 | Nan             | Northern     | 103 | 20 | 0.4 | 14.6 | 15.9 | 196.8 |
| ULR320 | Nan             | Northern     | 112 | 18 | 0.8 | 18.0 | 17.4 | 91.0  |
| ULR321 | Nan             | Northern     | 104 | 26 | 0.5 | 12.1 | 13.1 | 300.2 |
| ULR322 | Nan             | Northern     | 102 | 27 | 0.3 | 16.1 | 20.1 | 129.3 |
| ULR323 | Nan             | Northern     | 105 | 23 | 0.6 | 10.6 | 13.3 | 126.3 |
| ULR324 | Nan             | Northern     | 105 | 20 | 0.6 | 14.5 | 14.4 | 118.3 |
| ULR325 | Nan             | Northern     | 107 | 32 | 0.4 | 15.3 | 18.0 | 122.7 |
| ULR328 | Loei            | Northern     | 107 | 30 | 0.7 | 12.8 | 14.3 | 77.4  |
| ULR329 | Phatthalung     | Southern     | 115 | 25 | 0.9 | 17.3 | 16.9 | 84.6  |
| ULR330 | Phatthalung     | Southern     | 115 | 19 | 0.7 | 20.9 | 23.5 | 112.4 |
| ULR331 | Maha<br>Sarakhm | Northeastern | 117 | 19 | 0.9 | 12.3 | 18.5 | 38.9  |
| ULR333 | Chaiyaphum      | Northeastern | 108 | 58 | 0.1 | 12.8 | 11.4 | 155.1 |
| ULR335 | Chaiyaphum      | Northeastern | 121 | 21 | 0.7 | 20.9 | 24.1 | 0.0   |
| ULR338 | Nong Khai       | Northeastern | 105 | 29 | 0.6 | 13.6 | 14.3 | 272.7 |
| ULR339 | Nong Khai       | Northeastern | 105 | 33 | 0.6 | 11.9 | 10.9 | 225.6 |
| ULR342 | Nong Khai       | Northeastern | 98  | 26 | 0.5 | 12.8 | 13.6 | 377.3 |
| ULR344 | Trang           | Southern     | 113 | 33 | 0.3 | 20.6 | 20.3 | 72.5  |
| ULR345 | Trang           | Southern     | 117 | 30 | 0.7 | 9.0  | 10.5 | 136.8 |
| ULR346 | Trang           | Southern     | 112 | 24 | 0.2 | 12.4 | 11.9 | 60.8  |
| ULR348 | Trang           | Southern     | 114 | 26 | 0.6 | 13.0 | 14.3 | 141.5 |
| ULR351 | Phitsanulok     | Northern     | 101 | 24 | 0.4 | 14.0 | 12.0 | 197.7 |
| ULR352 | Phitsanulok     | Northern     | 107 | 20 | 0.7 | 11.8 | 15.0 | 157.4 |
| ULR353 | Phitsanulok     | Northern     | 111 | 16 | 0.8 | 9.0  | 10.1 | 35.1  |
| ULR355 | Phitsanulok     | Northern     | 104 | 26 | 0.7 | 10.9 | 12.0 | 130.0 |

|        |             |              |     |    |     |      |      |       |
|--------|-------------|--------------|-----|----|-----|------|------|-------|
| ULR356 | Phitsanulok | Northern     | 113 | 22 | 0.7 | 16.9 | 13.6 | 21.0  |
| ULR357 | Phitsanulok | Northern     | 107 | 61 | 0.0 | 11.4 | 13.1 | 13.3  |
| ULR358 | Phitsanulok | Northern     | 109 | 17 | 0.7 | 15.5 | 17.6 | 158.8 |
| ULR360 | Phitsanulok | Northern     | 103 | 56 | 0.4 | 13.8 | 13.9 | 117.3 |
| ULR362 | Phitsanulok | Northern     | 106 | 19 | 0.6 | 12.8 | 12.3 | 43.6  |
| ULR363 | Phitsanulok | Northern     | 106 | 19 | 0.6 | 22.1 | 21.5 | 274.5 |
| ULR364 | Phitsanulok | Northern     | 99  | 23 | 0.6 | 14.5 | 13.5 | 386.1 |
| ULR366 | Phitsanulok | Northern     | 100 | 26 | 0.6 | 13.3 | 14.4 | 292.9 |
| ULR367 | Phitsanulok | Northern     | 107 | 26 | 0.6 | 14.0 | 14.0 | 177.9 |
| ULR368 | Khon Kaen   | Northeastern | 72  | 29 | 0.0 | 11.0 | 26.4 | 91.6  |
| ULR369 | Nong Khai   | Northeastern | 101 | 18 | 0.6 | 14.6 | 16.3 | 227.0 |
| ULR370 | Phitsanulok | Northern     | 96  | 24 | 0.5 | 10.4 | 13.5 | 234.7 |
| ULR374 | Khon Kaen   | Northeastern | 107 | 29 | 0.5 | 11.9 | 12.4 | 165.7 |
| ULR376 | Nong Khai   | Northeastern | 103 | 29 | 0.6 | 12.6 | 12.6 | 259.1 |
| ULR377 | Nong Khai   | Northeastern | 98  | 30 | 0.5 | 14.0 | 13.4 | 364.7 |
| ULR378 | Nong Khai   | Northeastern | 106 | 18 | 0.6 | 17.5 | 15.0 | 197.8 |
| ULR379 | Chiang Rai  | Northern     | 109 | 22 | 0.7 | 12.0 | 12.5 | 191.7 |
| ULR380 | Chiang Rai  | Northern     | 100 | 25 | 0.5 | 11.6 | 13.5 | 223.0 |
| ULR382 | Chiang Rai  | Northern     | 107 | 20 | 0.8 | 10.5 | 18.9 | 254.9 |
| ULR383 | Chiang Rai  | Northern     | 101 | 18 | 0.6 | 17.3 | 18.6 | 276.3 |
| ULR385 | Chiang Rai  | Northern     | 106 | 23 | 0.7 | 9.6  | 9.5  | 186.3 |
| ULR386 | Chiang Rai  | Northern     | 106 | 24 | 0.6 | 12.0 | 12.9 | 173.8 |
| ULR387 | Chiang Rai  | Northern     | 107 | 20 | 0.7 | 10.3 | 13.0 | 231.2 |
| ULR388 | Chiang Rai  | Northern     | 99  | 25 | 0.6 | 13.5 | 13.6 | 346.0 |
| ULR389 | Chiang Rai  | Northern     | 109 | 23 | 0.7 | 11.1 | 13.3 | 151.3 |
| ULR390 | Chiang Rai  | Northern     | 101 | 20 | 0.5 | 14.3 | 15.1 | 65.8  |
| ULR391 | Chiang Rai  | Northern     | 112 | 23 | 0.8 | 9.6  | 11.0 | 37.8  |
| ULR392 | Chiang Rai  | Northern     | 108 | 20 | 0.7 | 11.6 | 12.1 | 100.4 |
| ULR393 | Chiang Rai  | Northern     | 107 | 24 | 0.7 | 12.8 | 13.4 | 267.9 |
| ULR394 | Chiang Rai  | Northern     | 104 | 18 | 0.6 | 6.9  | 12.5 | 194.8 |
| ULR397 | Chiang Rai  | Northern     | 96  | 23 | 0.4 | 14.5 | 18.8 | 228.9 |
| ULR398 | Chiang Rai  | Northern     | 106 | 27 | 0.6 | 14.6 | 14.5 | 339.8 |
| ULR399 | Chiang Rai  | Northern     | 107 | 18 | 0.6 | 17.9 | 16.9 | 140.0 |
| ULR401 | Chiang Rai  | Northern     | 106 | 26 | 0.4 | 11.4 | 15.0 | 146.4 |
| ULR402 | Chiang Rai  | Northern     | 100 | 18 | 0.6 | 21.6 | 20.9 | 325.3 |
| ULR403 | Chiang Rai  | Northern     | 95  | 26 | 0.5 | 12.3 | 14.0 | 388.3 |
| ULR406 | Chiang Rai  | Northern     | 100 | 26 | 0.5 | 14.1 | 11.9 | 220.2 |



|        |            |              |     |    |      |      |      |       |
|--------|------------|--------------|-----|----|------|------|------|-------|
| ULR408 | Chiang Rai | Northern     | 101 | 18 | 0.6  | 17.8 | 17.8 | 365.1 |
| ULR409 | Nong Khai  | Northeastern | 116 | 20 | 0.6  | 7.9  | 8.6  | 72.9  |
| ULR410 | Nong Khai  | Northeastern | 105 | 21 | 0.7  | 9.3  | 12.4 | 142.5 |
| ULR411 | Nong Khai  | Northeastern | 105 | 24 | 0.6  | 12.9 | 13.6 | 205.2 |
| ULR412 | Nong Khai  | Northeastern | 99  | 23 | 0.6  | 12.1 | 12.5 | 272.5 |
| ULR413 | Nong Khai  | Northeastern | 108 | 28 | 0.7  | 11.9 | 12.9 | 150.9 |
| ULR414 | Nong Khai  | Northeastern | 101 | 23 | 0.5  | 12.9 | 13.0 | 199.7 |
| ULR415 | Nong Khai  | Northeastern | 103 | 28 | 0.6  | 8.6  | 8.8  | 204.5 |
| ULR418 | Trang      | Southern     | 111 | 75 | 0.1  | 11.6 | 11.3 | 95.3  |
| ULR419 | Trang      | Southern     | 106 | 72 | 0.0  | 12.8 | 13.9 | 144.2 |
| ULR420 | Trang      | Southern     | 106 | 61 | -0.1 | 9.8  | 13.6 | 128.3 |
| ULR421 | Trang      | Southern     | 108 | 76 | -0.1 | 14.3 | 14.4 | 84.9  |

DTF=days to flowering, BVP=base vegetative phase, PSI=Photoperiod sensitivity index,  
GY=grain yield
